# Supplementary material for: Examining the Double Burden of Underweight, Overweight/Obesity and Iron Deficiency among Young Children in a Canadian Primary Care Setting
Source: MDPI journal article supplement (doi:10.3390/nu15163635), 2023-08-18
Supplement: s1 [file s1]

**Table S1.** Characteristics of children with data on zBMI compared with children who had missing data on zBMI (n=208).

| Characteristics                         | Response Sample |                    | Children with Missing zBMI Data |                                 |
|-----------------------------------------|-----------------|--------------------|---------------------------------|---------------------------------|
|                                         | n               | Mean (SD) or N (%) | n                               | Mean (SD) or N (%) <sup>1</sup> |
| <b>Patient-level characteristics</b>    |                 |                    |                                 |                                 |
| Child age, months                       | 1953            | 18.3 (5.0)         | 208                             | 17.9 (5.3)                      |
| Child sex, Female                       | 1953            | 945 (48.4)         | 208                             | 91 (43.8)                       |
| zBMI                                    | 1953            | 0.13 (1.1)         | 0                               | –                               |
| Weight category                         | 1953            |                    | 0                               |                                 |
| Underweight (zBMI < -2)                 |                 | 51 (2.6)           |                                 | –                               |
| Normal weight (-2 ≤ zBMI ≤ 1)           |                 | 1495 (76.6)        |                                 | –                               |
| At-risk-of-overweight (1 < zBMI ≤ 2)    |                 | 312 (16.0)         |                                 | –                               |
| Overweight/obese (zBMI > 2)             |                 | 95 (4.9)           |                                 | –                               |
| Birthweight, kg                         | 1835            | 3.3 (0.6)          | 168                             | 3.3 (0.6)                       |
| Maternal ethnicity <sup>2</sup>         | 1725            |                    | 144                             |                                 |
| European                                |                 | 1112 (64.5)        |                                 | 84 (58.3)                       |
| Non-European                            |                 | 613 (35.5)         |                                 | 60 (41.7)                       |
| Maternal education                      | 1763            |                    | 130                             |                                 |
| High school or less                     |                 | 141 (8.0)          |                                 | 13 (10.0)                       |
| College/University                      |                 | 1622 (92.0)        |                                 | 117 (90.0)                      |
| Family income (CAN \$)                  | 1604            |                    | 98                              |                                 |
| Less than \$40,000                      |                 | 161 (10.0)         |                                 | 16 (16.3)                       |
| \$40,000 - \$79,999                     |                 | 227 (14.2)         |                                 | 9 (9.2)                         |
| \$80,000 - \$149,999                    |                 | 546 (34.0)         |                                 | 25 (25.5)                       |
| \$150,000 +                             |                 | 670 (41.8)         |                                 | 48 (49.0)                       |
| <b>Infant feeding practices</b>         |                 |                    |                                 |                                 |
| Breastfeeding duration ≥12 months       | 1640            | 869 (53.0)         | 128                             | 59 (46.1)                       |
| Bottle use >15 months                   | 1612            | 480 (29.8)         | 114                             | 32 (28.1)                       |
| Daily cow's milk intake >2 cups (500mL) | 1620            | 422 (26.1)         | 122                             | 28 (23.0)                       |
| <b>Laboratory characteristics</b>       |                 |                    |                                 |                                 |
| Serum ferritin (µg/L)                   | 1953            | 27.4 (18.7)        | 208                             | 28.8 (19.7)                     |
| Iron deficiency                         | 1953            | 269 (13.8)         | 208                             | 25 (12.0)                       |

<sup>1</sup>Data are presented as mean (SD) or N (%). <sup>2</sup>Maternal ethnicity: European includes Western European, Eastern European, and Australian or New Zealander; Non-European includes East Asian, Southeast Asian, South Asian, West Asian, African, Caribbean, Latin American, North American Indigenous, and Mixed (2 or more ethnic groups). .
